# Supplementary material for: Integrative proteomics and bioinformatic prediction enable a high-confidence apicoplast proteome in malaria parasites
Source: PLoS Biol. 2018 Sep 13;16(9):e2005895. doi: 10.1371/journal.pbio.2005895 (PMC6155542; doi:10.1371/journal.pbio.2005895)
Supplement: S4 Table — (XLSX) [file pbio.2005895.s012.xlsx]

## Sheet: PlastNNPositiveTrainingSet
Reference	Annotation
PF3D7_0103600.1	ATP-dependent RNA helicase, putative
PF3D7_0106900.1	2-C-methyl-D-erythritol 4-phosphate cytidylyltransferase, putative
PF3D7_0107900.1	conserved Plasmodium protein, unknown function
PF3D7_0111500.1	UMP-CMP kinase, putative
PF3D7_0203900.1	5'-3' exonuclease, N-terminal resolvase-like domain, putative
PF3D7_0204600.1	5'-3' exonuclease, putative
PF3D7_0206100.1	cysteine desulfuration protein SufE
PF3D7_0208500.1	acyl carrier protein
PF3D7_0209300.1	2C-methyl-D-erythritol 2,4-cyclodiphosphate synthase
PF3D7_0211400.1	beta-ketoacyl-ACP synthase III
PF3D7_0302600.1	ABC transporter B family member 4, putative
PF3D7_0305000.1	elongation factor Ts
PF3D7_0307400.1	ATP-dependent Clp protease proteolytic subunit
PF3D7_0307800.1	conserved Plasmodium protein, unknown function
PF3D7_0311200.1	valine--tRNA ligase, putative
PF3D7_0313700.1	conserved Plasmodium protein, unknown function, unspecified product
PF3D7_0313800.1	conserved Plasmodium protein, unknown function
PF3D7_0314300.1	DER1-like protein
PF3D7_0316300.2	inorganic pyrophosphatase, putative
PF3D7_0316400.1	conserved Plasmodium protein, unknown function
PF3D7_0319200.1	endonuclease/exonuclease/phosphatase family protein, putative
PF3D7_0321000.1	conserved Plasmodium protein, unknown function
PF3D7_0408900.1	tRNA N6-adenosine threonylcarbamoyltransferase
PF3D7_0408900.2	tRNA N6-adenosine threonylcarbamoyltransferase
PF3D7_0410700.1	ribosome biogenesis GTPase A, putative
PF3D7_0411200.1	conserved Plasmodium protein, unknown function
PF3D7_0414100.1	conserved Plasmodium membrane protein, unknown function
PF3D7_0414700.1	GTP-binding protein, putative
PF3D7_0416100.1	glutamyl-tRNA(Gln) amidotransferase subunit A
PF3D7_0420200.1	holo-[acyl-carrier-protein] synthase, putative
PF3D7_0503100.1	4-diphosphocytidyl-2-C-methyl-D-erythritol kinase, putative
PF3D7_0505400.1	conserved Plasmodium protein, unknown function
PF3D7_0508800.1	single-stranded DNA-binding protein
PF3D7_0509600.1	asparagine--tRNA ligase
PF3D7_0514300.1	aspartate--tRNA ligase, putative
PF3D7_0516300.1	tRNA pseudouridine synthase, putative
PF3D7_0518100.1	RAP protein, putative
PF3D7_0520800.1	conserved Plasmodium protein, unknown function
PF3D7_0521400.1	conserved Plasmodium protein, unknown function
PF3D7_0522700.1	iron-sulfur assembly protein, putative
PF3D7_0526700.1	conserved protein, unknown function
PF3D7_0529300.1	apicoplast TIC22 protein
PF3D7_0530200.1	phosphoenolpyruvate/phosphate translocator
PF3D7_0602400.1	elongation factor G
PF3D7_0604700.1	glyoxalase I
PF3D7_0607300.1	uroporphyrinogen III decarboxylase
PF3D7_0608100.1	conserved Plasmodium protein, unknown function
PF3D7_0615100.1	enoyl-acyl carrier reductase
PF3D7_0616400.1	conserved Plasmodium protein, unknown function
PF3D7_0622700.1	conserved Plasmodium membrane protein, unknown function
PF3D7_0623200.1	ferredoxin--NADP reductase
PF3D7_0624400.1	conserved Plasmodium protein, unknown function
PF3D7_0626300.1	3-oxoacyl-acyl-carrier protein synthase I/II
PF3D7_0628800.1	glutamyl-tRNA(Gln) amidotransferase subunit B
PF3D7_0704900.1	peptide chain release factor 2
PF3D7_0706100.1	conserved Plasmodium protein, unknown function
PF3D7_0707800.1	RAP protein, putative
PF3D7_0711000.1	AAA family ATPase, CDC48 subfamily
PF3D7_0716600.1	cysteine desulfurase
PF3D7_0719800.1	conserved Plasmodium protein, unknown function
PF3D7_0723700.1	metallo-hydrolase/oxidoreductase, putative
PF3D7_0727100.1	conserved Plasmodium protein, unknown function
PF3D7_0727500.1	mTERF domain-containing protein, putative
PF3D7_0728800.1	conserved Plasmodium protein, unknown function
PF3D7_0729200.1	1-cys peroxiredoxin
PF3D7_0804400.1	methionine aminopeptidase 1c, putative
PF3D7_0806900.1	conserved Plasmodium protein, unknown function
PF3D7_0811900.1	RNA-binding protein, putative
PF3D7_0812220.1	GTPase, putative
PF3D7_0813700.1	ABC transporter F family member 1, putative
PF3D7_0815700.1	ubiquitin
PF3D7_0815900.1	dihydrolipoyl dehydrogenase, apicoplast
PF3D7_0816600.1	chaperone protein ClpB1
PF3D7_0820800.1	conserved Plasmodium protein, unknown function
PF3D7_0823600.1	lipoate-protein ligase B
PF3D7_0827500.1	apicoplast ribosomal protein L21 precursor, putative
PF3D7_0827600.1	conserved Plasmodium protein, unknown function
PF3D7_0828200.1	leucine--tRNA ligase, putative
PF3D7_0904700.1	bacterial histone-like protein
PF3D7_0906200.1	conserved Plasmodium protein, unknown function
PF3D7_0907900.1	peptide deformylase
PF3D7_0911700.1	GTP-binding protein, putative
PF3D7_0913700.1	conserved Plasmodium protein, unknown function
PF3D7_0913900.1	arginine--tRNA ligase, putative
PF3D7_0914300.1	met-10+ like protein, putative
PF3D7_0916200.1	conserved Plasmodium protein, unknown function
PF3D7_0916500.1	ubiquitin fusion degradation protein 1
PF3D7_0918200.1	50S ribosomal protein L3, apicoplast, putative
PF3D7_0920200.1	CS domain protein, putative
PF3D7_0920600.1	conserved Plasmodium protein, unknown function
PF3D7_0921400.1	NifU-like scaffold protein, putative
PF3D7_0922900.1	3-oxoacyl-[acyl-carrier-protein] reductase
PF3D7_0925300.1	proline--tRNA ligase, putative
PF3D7_0929900.1	conserved Plasmodium protein, unknown function
PF3D7_0930100.1	conserved Plasmodium protein, unknown function
PF3D7_0934000.1	histidine--tRNA ligase, putative
PF3D7_1005000.1	methionine--tRNA ligase, putative
PF3D7_1005900.1	conserved Plasmodium protein, unknown function
PF3D7_1015200.1	cysteine--tRNA ligase
PF3D7_1015200.2	cysteine--tRNA ligase
PF3D7_1018000.1	tRNA pseudouridine synthase, putative
PF3D7_1020800.1	dihydrolipoamide acyltransferase component E2
PF3D7_1021000.1	conserved Plasmodium protein, unknown function
PF3D7_1021300.1	conserved Plasmodium membrane protein, unknown function
PF3D7_1022800.1	4-hydroxy-3-methylbut-2-en-1-yl diphosphate synthase
PF3D7_1025300.1	conserved Plasmodium protein, unknown function
PF3D7_1032000.1	ribosome maturation factor RimM, putative
PF3D7_1037100.1	pyruvate kinase 2
PF3D7_1103400.1	FeS cluster assembly protein SufD, putative
PF3D7_1106200.1	conserved Plasmodium protein, unknown function
PF3D7_1106300.1	exonuclease, putative
PF3D7_1106500.1	conserved Plasmodium protein, unknown function
PF3D7_1114800.1	glycerol-3-phosphate dehydrogenase, putative
PF3D7_1117500.1	tyrosine--tRNA ligase
PF3D7_1120500.1	tRNA nucleotidyltransferase, putative
PF3D7_1124500.1	pyruvate dehydrogenase E1 component subunit alpha
PF3D7_1126000.1	threonine--tRNA ligase
PF3D7_1144700.1	apicoplast import protein Tic20, putative
PF3D7_1145500.1	ABC transporter B family member 3, putative
PF3D7_1205300.1	conserved Plasmodium protein, unknown function
PF3D7_1205700.1	targeted glyoxalase II
PF3D7_1207600.1	tRNA delta(2)-isopentenylpyrophosphate transferase, putative
PF3D7_1209600.1	porphobilinogen deaminase
PF3D7_1212000.1	glutathione peroxidase-like thioredoxin peroxidase
PF3D7_1212100.1	peripheral plastid protein 1, putative
PF3D7_1216000.1	serine--tRNA ligase, putative
PF3D7_1217300.1	GTP-binding protein, putative
PF3D7_1220600.1	conserved Plasmodium protein, unknown function
PF3D7_1221700.1	FbpA domain protein, putative
PF3D7_1221800.1	conserved Plasmodium protein, unknown function
PF3D7_1223300.1	DNA gyrase subunit A
PF3D7_1225100.1	isoleucine--tRNA ligase, putative
PF3D7_1228700.1	conserved Plasmodium protein, unknown function
PF3D7_1229600.1	conserved Plasmodium protein, unknown function
PF3D7_1232000.1	phenylalanine--tRNA ligase
PF3D7_1232100.1	60 kDa chaperonin
PF3D7_1234600.1	protein TOC75, putative
PF3D7_1239500.1	DNA gyrase subunit B
PF3D7_1244000.1	glucose inhibited division protein a homologue, putative
PF3D7_1244400.1	RNA-binding protein, putative
PF3D7_1251700.1	tryptophan--tRNA ligase
PF3D7_1304100.1	DNA ligase I
PF3D7_1304600.1	conserved Plasmodium protein, unknown function
PF3D7_1305100.1	conserved Plasmodium protein, unknown function
PF3D7_1306200.1	conserved Plasmodium protein, unknown function
PF3D7_1307600.1	DNA-directed RNA polymerase alpha chain, putative
PF3D7_1308800.1	tyrosine recombinase
PF3D7_1312000.1	malonyl CoA-acyl carrier protein transacylase
PF3D7_1313200.1	methionyl-tRNA formyltransferase, putative
PF3D7_1313400.1	DEAD box helicase, putative
PF3D7_1318100.1	ferredoxin, putative
PF3D7_1318200.1	glycerol-3-phosphate 1-O-acyltransferase
PF3D7_1320100.1	ATP-dependent Clp protease adapter protein ClpS
PF3D7_1323000.1	beta-hydroxyacyl-ACP dehydratase
PF3D7_1323600.1	conserved Plasmodium protein, unknown function
PF3D7_1329700.1	apicoplast calcium binding protein 1
PF3D7_1332600.1	apurinic/apyrimidinic endonuclease Apn1, putative
PF3D7_1333000.1	20 kDa chaperonin
PF3D7_1333200.1	ubiquitin-activating enzyme
PF3D7_1337200.1	1-deoxy-D-xylulose 5-phosphate synthase
PF3D7_1338600.1	conserved Plasmodium protein, unknown function
PF3D7_1343500.1	conserved Plasmodium protein, unknown function
PF3D7_1344600.1	lipoyl synthase
PF3D7_1345500.1	ubiquitin-conjugating enzyme E2
PF3D7_1350700.1	N6-adenine-specific methylase, putative
PF3D7_1351800.1	conserved Plasmodium protein, unknown function
PF3D7_1352000.1	conserved Plasmodium protein, unknown function
PF3D7_1357200.1	glutamate--tRNA ligase
PF3D7_1358000.1	patatin-like phospholipase, putative
PF3D7_1358300.1	rhomboid protease ROM7
PF3D7_1363700.1	conserved Plasmodium protein, unknown function
PF3D7_1364600.1	aldehyde reductase, putative
PF3D7_1367700.1	alanine--tRNA ligase
PF3D7_1369600.1	conserved Plasmodium protein, unknown function
PF3D7_1405400.1	DNA mismatch repair protein, putative
PF3D7_1406400.1	pentatricopeptide repeat domain-containing protein, putative
PF3D7_1406600.1	ATP-dependent Clp protease regulatory subunit ClpC, putative
PF3D7_1409100.1	aldo-keto reductase, putative
PF3D7_1411400.1	plastid replication-repair enzyme
PF3D7_1411600.1	GTP-binding protein, putative
PF3D7_1411800.1	conserved Plasmodium protein, unknown function
PF3D7_1413400.1	30S ribosomal protein S9, putative
PF3D7_1413500.1	FeS assembly ATPase SufC
PF3D7_1416800.1	lysine--tRNA ligase, putative
PF3D7_1419200.1	thioredoxin-like protein, putative
PF3D7_1419800.2	glutathione reductase
PF3D7_1420400.1	glycine--tRNA ligase
PF3D7_1427000.1	conserved Plasmodium protein, unknown function
PF3D7_1428600.1	peptide chain release factor 1
PF3D7_1429100.1	apicoplast ribosomal protein L15 precursor, putative
PF3D7_1430700.1	NADP-specific glutamate dehydrogenase
PF3D7_1433700.1	conserved Plasmodium protein, unknown function
PF3D7_1436800.1	ATP-dependent Clp protease proteolytic subunit
PF3D7_1437100.1	conserved Plasmodium protein, unknown function
PF3D7_1440200.1	stromal-processing peptidase, putative
PF3D7_1440300.1	porphobilinogen synthase
PF3D7_1443900.1	heat shock protein 90, putative
PF3D7_1446400.1	pyruvate dehydrogenase E1 component subunit beta
PF3D7_1452300.1	DER1-like protein
PF3D7_1467300.1	1-deoxy-D-xylulose 5-phosphate reductoisomerase
PF3D7_1469000.1	translation initiation factor IF-1
PF3D7_1469600.1	biotin carboxylase subunit of acetyl CoA carboxylase, putative
PF3D7_1470800.1	conserved Plasmodium protein, unknown function
PF3D7_1472700.1	DNA-directed RNA polymerase, alpha subunit, putative
PF3D7_1472800.1	conserved Plasmodium protein, unknown function
