# Supplementary material for: Integrative proteomics and bioinformatic prediction enable a high-confidence apicoplast proteome in malaria parasites
Source: PLoS Biol. 2018 Sep 13;16(9):e2005895. doi: 10.1371/journal.pbio.2005895 (PMC6155542; doi:10.1371/journal.pbio.2005895)
Supplement: S8 Table — (XLSX) [file pbio.2005895.s016.xlsx]

## Sheet: CompiledApicoplastProteome
Reference	Annotation	Novelty	OrthoMCL Conservation	Pb Essentiality	Pf Essentiality
PF3D7_0103600.1	ATP-dependent RNA helicase, putative	Known Pathway	Plasmodium and Other Apicomplexa	ND	Mutable in CDS
PF3D7_0208500.1	acyl carrier protein	Known Pathway	Conserved Outside of Apicomplexa	Essential	Non - Mutable in CDS
PF3D7_0208600.1	ribosome-recycling factor	Known Pathway	Plasmodium Only	Essential	Non - Mutable in CDS
PF3D7_0311200.1	valine--tRNA ligase, putative	Known Pathway	Plasmodium Only	Essential	Non - Mutable in CDS
PF3D7_0313700.1	conserved Plasmodium protein, unknown function, unspecified product	Unknown Function	Plasmodium Only	Essential	Non - Mutable in CDS
PF3D7_0319200.1	endonuclease/exonuclease/phosphatase family protein, putative	Annotated Gene Product, Unknown Function	Conserved Outside of Apicomplexa	Dispensable	Mutable in CDS
PF3D7_0408900.1	tRNA N6-adenosine threonylcarbamoyltransferase	Known Pathway	Plasmodium Only	Essential	Non - Mutable in CDS
PF3D7_0410700.1	ribosome biogenesis GTPase A, putative	Known Pathway	Conserved Outside of Apicomplexa	Essential	Non - Mutable in CDS
PF3D7_0411200.1	conserved Plasmodium protein, unknown function	Unknown Function	Conserved Outside of Apicomplexa	Essential	Non - Mutable in CDS
PF3D7_0414100.1	conserved Plasmodium membrane protein, unknown function	Unknown Function	Plasmodium Only	Slow	Mutable in CDS
PF3D7_0414700.1	GTP-binding protein, putative	Annotated Gene Product, Unknown Function	Conserved Outside of Apicomplexa	Slow	Mutable in CDS
PF3D7_0416100.1	glutamyl-tRNA(Gln) amidotransferase subunit A	Known Pathway	Conserved Outside of Apicomplexa	Slow	Non - Mutable in CDS
PF3D7_0503100.1	4-diphosphocytidyl-2-C-methyl-D-erythritol kinase, putative	Known Pathway	Conserved Outside of Apicomplexa	Essential	Non - Mutable in CDS
PF3D7_0505400.1	conserved Plasmodium protein, unknown function	Unknown Function	Plasmodium and Other Apicomplexa	Essential	Non - Mutable in CDS
PF3D7_0509600.1	asparagine--tRNA ligase	Known Pathway	Conserved Outside of Apicomplexa	Essential	Non - Mutable in CDS
PF3D7_0514300.1	aspartate--tRNA ligase, putative	Known Pathway	Plasmodium Only	ND	Non - Mutable in CDS
PF3D7_0602400.1	elongation factor G	Known Pathway	Conserved Outside of Apicomplexa	Essential	Non - Mutable in CDS
PF3D7_0608100.1	conserved Plasmodium protein, unknown function	Unknown Function	Plasmodium Only	Essential	Non - Mutable in CDS
PF3D7_0628800.1	glutamyl-tRNA(Gln) amidotransferase subunit B	Known Pathway	Conserved Outside of Apicomplexa	Essential	Non - Mutable in CDS
PF3D7_0706100.1	conserved Plasmodium protein, unknown function	Unknown Function	Conserved Outside of Apicomplexa	Essential	Mutable in CDS
PF3D7_0707800.1	RAP protein, putative	Annotated Gene Product, Unknown Function	Plasmodium and Other Apicomplexa	Essential	Non - Mutable in CDS
PF3D7_0727100.1	conserved Plasmodium protein, unknown function	Unknown Function	Plasmodium and Other Apicomplexa	Essential	Non - Mutable in CDS
PF3D7_0727500.1	mTERF domain-containing protein, putative	Annotated Gene Product, Unknown Function	Conserved Outside of Apicomplexa	Essential	Non - Mutable in CDS
PF3D7_0813700.1	ABC transporter F family member 1, putative	Annotated Gene Product, Unknown Function	Conserved Outside of Apicomplexa	Essential	Non - Mutable in CDS
PF3D7_0827500.1	apicoplast ribosomal protein L21 precursor, putative	Known Pathway	Conserved Outside of Apicomplexa	Essential	Non - Mutable in CDS
PF3D7_0828200.1	leucine--tRNA ligase, putative	Known Pathway	Conserved Outside of Apicomplexa	Essential	Non - Mutable in CDS
PF3D7_0911700.1	GTP-binding protein, putative	Annotated Gene Product, Unknown Function	Conserved Outside of Apicomplexa	Slow	Mutable in CDS
PF3D7_0913900.1	arginine--tRNA ligase, putative	Known Pathway	Conserved Outside of Apicomplexa	Essential	Non - Mutable in CDS
PF3D7_0920200.1	CS domain protein, putative	Annotated Gene Product, Unknown Function	Conserved Outside of Apicomplexa	Essential	Non - Mutable in CDS
PF3D7_0920600.1	conserved Plasmodium protein, unknown function	Unknown Function	Plasmodium Only	ND	Non - Mutable in CDS
PF3D7_0921700.1	conserved Plasmodium protein, unknown function	Unknown Function	Plasmodium and Other Apicomplexa	ND	Non - Mutable in CDS
PF3D7_0934000.1	histidine--tRNA ligase, putative	Known Pathway	Conserved Outside of Apicomplexa	ND	Mutable in CDS
PF3D7_1032000.1	ribosome maturation factor RimM, putative	Known Pathway	Plasmodium and Other Apicomplexa	ND	Non - Mutable in CDS
PF3D7_1217300.1	GTP-binding protein, putative	Annotated Gene Product, Unknown Function	Conserved Outside of Apicomplexa	Essential	Non - Mutable in CDS
PF3D7_1223300.1	DNA gyrase subunit A	Known Pathway	Conserved Outside of Apicomplexa	ND	Non - Mutable in CDS
PF3D7_1225100.1	isoleucine--tRNA ligase, putative	Known Pathway	Conserved Outside of Apicomplexa	Slow	Mutable in CDS
PF3D7_1225900.1	conserved Plasmodium protein, unknown function	Unknown Function	Plasmodium Only	ND	Non - Mutable in CDS
PF3D7_1232000.1	phenylalanine--tRNA ligase	Known Pathway	Plasmodium Only	ND	Non - Mutable in CDS
PF3D7_1239500.1	DNA gyrase subunit B	Known Pathway	Conserved Outside of Apicomplexa	Essential	Non - Mutable in CDS
PF3D7_1244000.1	glucose inhibited division protein a homologue, putative	Annotated Gene Product, Unknown Function	Conserved Outside of Apicomplexa	Essential	Non - Mutable in CDS
PF3D7_1244400.1	RNA-binding protein, putative	Annotated Gene Product, Unknown Function	Plasmodium and Other Apicomplexa	ND	Non - Mutable in CDS
PF3D7_1304600.1	conserved Plasmodium protein, unknown function	Unknown Function	Plasmodium Only	Slow	Non - Mutable in CDS
PF3D7_1313400.1	DEAD box helicase, putative	Known Pathway	Plasmodium and Other Apicomplexa	Essential	Mutable in CDS
PF3D7_1338600.1	conserved Plasmodium protein, unknown function	Unknown Function	Plasmodium and Other Apicomplexa	ND	Non - Mutable in CDS
PF3D7_1351800.1	conserved Plasmodium protein, unknown function	Unknown Function	Plasmodium Only	ND	Non - Mutable in CDS
PF3D7_1352000.1	conserved Plasmodium protein, unknown function	Unknown Function	Plasmodium and Other Apicomplexa	ND	Mutable in CDS
PF3D7_1358300.1	rhomboid protease ROM7	Annotated Gene Product, Unknown Function	Conserved Outside of Apicomplexa	ND	Mutable in CDS
PF3D7_1364600.1	aldehyde reductase, putative	Annotated Gene Product, Unknown Function	Conserved Outside of Apicomplexa	ND	Non - Mutable in CDS
PF3D7_1405400.1	DNA mismatch repair protein, putative	Known Pathway	Plasmodium and Other Apicomplexa	Dispensable	Mutable in CDS
PF3D7_1413400.1	30S ribosomal protein S9, putative	Known Pathway	Conserved Outside of Apicomplexa	ND	Non - Mutable in CDS
PF3D7_1427000.1	conserved Plasmodium protein, unknown function	Unknown Function	Plasmodium Only	ND	Non - Mutable in CDS
PF3D7_1472800.1	conserved Plasmodium protein, unknown function	Unknown Function	Plasmodium and Other Apicomplexa	ND	Non - Mutable in CDS
PF3D7_0204600.1	5'-3' exonuclease, putative	Known Pathway	Plasmodium Only	Slow	Mutable in CDS
PF3D7_0302600.1	ABC transporter B family member 4, putative	Annotated Gene Product, Unknown Function	Plasmodium and Other Apicomplexa	Dispensable	Mutable in CDS
PF3D7_0305000.1	elongation factor Ts	Known Pathway	Conserved Outside of Apicomplexa	Essential	Non - Mutable in CDS
PF3D7_0516600.1	sporozoite surface antigen MB2	Annotated Gene Product, Unknown Function	Conserved Outside of Apicomplexa	Slow	Non - Mutable in CDS
PF3D7_0524600.1	50S ribosomal protein L12, apicoplast, putative	Known Pathway	Conserved Outside of Apicomplexa	ND	Non - Mutable in CDS
PF3D7_0621000.1	conserved Plasmodium protein, unknown function	Unknown Function	Conserved Outside of Apicomplexa	ND	Non - Mutable in CDS
PF3D7_0622700.1	conserved Plasmodium membrane protein, unknown function	Unknown Function	Plasmodium Only	ND	Mutable in CDS
PF3D7_0704900.1	peptide chain release factor 2	Known Pathway	Conserved Outside of Apicomplexa	Slow	Non - Mutable in CDS
PF3D7_0719800.1	conserved Plasmodium protein, unknown function	Unknown Function	Plasmodium and Other Apicomplexa	Essential	Non - Mutable in CDS
PF3D7_0906200.1	conserved Plasmodium protein, unknown function	Unknown Function	Plasmodium Only	ND	Non - Mutable in CDS
PF3D7_0914300.1	met-10+ like protein, putative	Annotated Gene Product, Unknown Function	Conserved Outside of Apicomplexa	Essential	Mutable in CDS
PF3D7_0929900.1	conserved Plasmodium protein, unknown function	Unknown Function	Plasmodium Only	Essential	Non - Mutable in CDS
PF3D7_1018000.1	tRNA pseudouridine synthase, putative	Known Pathway	Conserved Outside of Apicomplexa	Dispensable	Mutable in CDS
PF3D7_1106300.1	exonuclease, putative	Known Pathway	Conserved Outside of Apicomplexa	ND	Non - Mutable in CDS
PF3D7_1145500.1	ABC transporter B family member 3, putative	Annotated Gene Product, Unknown Function	Conserved Outside of Apicomplexa	ND	Mutable in CDS
PF3D7_1220600.1	conserved Plasmodium protein, unknown function	Unknown Function	Plasmodium Only	ND	Non - Mutable in CDS
PF3D7_1221700.1	FbpA domain protein, putative	Annotated Gene Product, Unknown Function	Plasmodium and Other Apicomplexa	Slow	Non - Mutable in CDS
PF3D7_1221800.1	conserved Plasmodium protein, unknown function	Unknown Function	Plasmodium and Other Apicomplexa	Essential	Non - Mutable in CDS
PF3D7_1409100.1	aldo-keto reductase, putative	Annotated Gene Product, Unknown Function	Conserved Outside of Apicomplexa	Essential	Non - Mutable in CDS
PF3D7_1411600.1	GTP-binding protein, putative	Annotated Gene Product, Unknown Function	Conserved Outside of Apicomplexa	ND	Non - Mutable in CDS
PF3D7_1428600.1	peptide chain release factor 1	Known Pathway	Conserved Outside of Apicomplexa	Dispensable	Non - Mutable in CDS
PF3D7_1429100.1	apicoplast ribosomal protein L15 precursor, putative	Known Pathway	Conserved Outside of Apicomplexa	ND	Non - Mutable in CDS
PF3D7_1437100.1	conserved Plasmodium protein, unknown function	Unknown Function	Plasmodium and Other Apicomplexa	ND	Non - Mutable in CDS
PF3D7_0930100.1	conserved Plasmodium protein, unknown function	Unknown Function	Conserved Outside of Apicomplexa	ND	Non - Mutable in CDS
PF3D7_1406400.1	pentatricopeptide repeat domain-containing protein, putative	Annotated Gene Product, Unknown Function	Conserved Outside of Apicomplexa	Essential	Non - Mutable in CDS
PF3D7_1416800.1	lysine--tRNA ligase, putative	Known Pathway	Plasmodium and Other Apicomplexa	Essential	Non - Mutable in CDS
PF3D7_0321000.1	conserved Plasmodium protein, unknown function	Unknown Function	Conserved Outside of Apicomplexa	ND	Non - Mutable in CDS
PF3D7_0420200.1	holo-[acyl-carrier-protein] synthase, putative	Known Pathway	Conserved Outside of Apicomplexa	ND	Non - Mutable in CDS
PF3D7_0522700.1	iron-sulfur assembly protein, putative	Known Pathway	Conserved Outside of Apicomplexa	Dispensable	Non - Mutable in CDS
PF3D7_0806900.1	conserved Plasmodium protein, unknown function	Unknown Function	Plasmodium and Other Apicomplexa	Essential	Non - Mutable in CDS
PF3D7_0907900.1	peptide deformylase	Known Pathway	Conserved Outside of Apicomplexa	Essential	Non - Mutable in CDS
PF3D7_1209900.1	ABC transporter B family member 7, putative	Annotated Gene Product, Unknown Function	Conserved Outside of Apicomplexa	ND	Mutable in CDS
PF3D7_0111500.1	UMP-CMP kinase, putative	Known Pathway	Conserved Outside of Apicomplexa	Insufficient data	Non - Mutable in CDS
PF3D7_1005000.1	methionine--tRNA ligase, putative	Known Pathway	Plasmodium Only	ND	Non - Mutable in CDS
PF3D7_1021000.1	conserved Plasmodium protein, unknown function	Unknown Function	Plasmodium and Other Apicomplexa	Essential	Non - Mutable in CDS
PF3D7_1021300.1	conserved Plasmodium membrane protein, unknown function	Unknown Function	Plasmodium Only	ND	Non - Mutable in CDS
PF3D7_1207600.1	tRNA delta(2)-isopentenylpyrophosphate transferase, putative	Known Pathway	Conserved Outside of Apicomplexa	Dispensable	Mutable in CDS
PF3D7_1305100.1	conserved Plasmodium protein, unknown function	Unknown Function	Plasmodium and Other Apicomplexa	ND	Non - Mutable in CDS
PF3D7_1313200.1	methionyl-tRNA formyltransferase, putative	Known Pathway	Conserved Outside of Apicomplexa	ND	Mutable in CDS
PF3D7_1411800.1	conserved Plasmodium protein, unknown function	Unknown Function	Conserved Outside of Apicomplexa	ND	Non - Mutable in CDS
PF3D7_1457300.1	conserved Plasmodium protein, unknown function	Unknown Function	Conserved Outside of Apicomplexa	Dispensable	Non - Mutable in CDS
PF3D7_0107900.1	conserved Plasmodium protein, unknown function	Unknown Function	Plasmodium Only	ND	Non - Mutable in CDS
PF3D7_0209300.1	2C-methyl-D-erythritol 2,4-cyclodiphosphate synthase	Known Pathway	Conserved Outside of Apicomplexa	ND	Non - Mutable in CDS
PF3D7_1020800.1	dihydrolipoamide acyltransferase component E2	Known Pathway	Conserved Outside of Apicomplexa	Dispensable	Non - Mutable in CDS
PF3D7_1419800.1	glutathione reductase	Known Pathway	Conserved Outside of Apicomplexa	Dispensable	Non - Mutable in CDS
PF3D7_1433700.1	conserved Plasmodium protein, unknown function	Unknown Function	Conserved Outside of Apicomplexa	ND	Mutable in CDS
PF3D7_0616400.1	conserved Plasmodium protein, unknown function	Unknown Function	Conserved Outside of Apicomplexa	Essential	Non - Mutable in CDS
PF3D7_0812220.1	GTPase, putative	Annotated Gene Product, Unknown Function	Conserved Outside of Apicomplexa	ND	Non - Mutable in CDS
PF3D7_1002600.1	conserved Plasmodium protein, unknown function	Unknown Function	Plasmodium Only	ND	Mutable in CDS
PF3D7_1005900.1	conserved Plasmodium protein, unknown function	Unknown Function	Plasmodium and Other Apicomplexa	Essential	Non - Mutable in CDS
PF3D7_1343500.1	conserved Plasmodium protein, unknown function	Unknown Function	Plasmodium Only	ND	Non - Mutable in CDS
PF3D7_0405400.1	pre-mRNA-processing-splicing factor 8, putative	Known Pathway	Conserved Outside of Apicomplexa	Essential	Non - Mutable in CDS
PF3D7_0627700.1	transportin	Known Pathway	Conserved Outside of Apicomplexa	Essential	Non - Mutable in CDS
PF3D7_0815700.1	ubiquitin	Known Pathway	Plasmodium Only	Slow	Non - Mutable in CDS
PF3D7_0508800.1	single-stranded DNA-binding protein	Known Pathway	Conserved Outside of Apicomplexa	Slow	Non - Mutable in CDS
PF3D7_0723700.1	metallo-hydrolase/oxidoreductase, putative	Annotated Gene Product, Unknown Function	Conserved Outside of Apicomplexa	ND	Non - Mutable in CDS
PF3D7_0827600.1	conserved Plasmodium protein, unknown function	Unknown Function	Conserved Outside of Apicomplexa	Essential	Non - Mutable in CDS
PF3D7_1229600.1	conserved Plasmodium protein, unknown function	Unknown Function	Plasmodium and Other Apicomplexa	ND	Non - Mutable in CDS
PF3D7_0516300.1	tRNA pseudouridine synthase, putative	Known Pathway	Conserved Outside of Apicomplexa	Slow	Mutable in CDS
PF3D7_0526700.1	conserved protein, unknown function	Unknown Function	Plasmodium Only	ND	Mutable in CDS
PF3D7_1369600.1	conserved Plasmodium protein, unknown function	Unknown Function	Plasmodium Only	Essential	Mutable in CDS
PF3D7_1106500.1	conserved Plasmodium protein, unknown function	Unknown Function	Plasmodium Only	ND	Non - Mutable in CDS
PF3D7_1350700.1	N6-adenine-specific methylase, putative	Known Pathway	Conserved Outside of Apicomplexa	ND	Non - Mutable in CDS
PF3D7_0728800.1	conserved Plasmodium protein, unknown function	Unknown Function	Plasmodium Only	Essential	Non - Mutable in CDS
PF3D7_0518100.1	RAP protein, putative	Annotated Gene Product, Unknown Function	Plasmodium Only	Essential	Mutable in CDS
PF3D7_0811900.1	RNA-binding protein, putative	Annotated Gene Product, Unknown Function	Conserved Outside of Apicomplexa	ND	Non - Mutable in CDS
PF3D7_1470800.1	conserved Plasmodium protein, unknown function	Unknown Function	Plasmodium Only	Essential	Non - Mutable in CDS
PF3D7_0307800.1	conserved Plasmodium protein, unknown function	Unknown Function	Conserved Outside of Apicomplexa	ND	Non - Mutable in CDS
PF3D7_0530200.1	phosphoenolpyruvate/phosphate translocator	Known Pathway	Conserved Outside of Apicomplexa	Essential	Mutable in CDS
PF3D7_1358000.1	patatin-like phospholipase, putative	Known Pathway	Plasmodium Only	Essential	Mutable in CDS
PF3D7_0804400.1	methionine aminopeptidase 1c, putative	Known Pathway	Plasmodium and Other Apicomplexa	Essential	Non - Mutable in CDS
PF3D7_0904700.1	bacterial histone-like protein	Known Pathway	Conserved Outside of Apicomplexa	ND	Non - Mutable in CDS
PF3D7_1025300.1	conserved Plasmodium protein, unknown function	Unknown Function	Plasmodium and Other Apicomplexa	Essential	Non - Mutable in CDS
PF3D7_1120500.1	tRNA nucleotidyltransferase, putative	Known Pathway	Conserved Outside of Apicomplexa	Essential	Non - Mutable in CDS
PF3D7_0521400.1	conserved Plasmodium protein, unknown function	Unknown Function	Conserved Outside of Apicomplexa	ND	Non - Mutable in CDS
PF3D7_1304100.1	DNA ligase I	Known Pathway	Conserved Outside of Apicomplexa	Essential	Non - Mutable in CDS
PF3D7_0925300.1	proline--tRNA ligase, putative	Known Pathway	Conserved Outside of Apicomplexa	ND	Non - Mutable in CDS
PF3D7_1413500.1	FeS assembly ATPase SufC	Known Pathway	Conserved Outside of Apicomplexa	Essential	Non - Mutable in CDS
PF3D7_0313800.1	conserved Plasmodium protein, unknown function	Unknown Function	Plasmodium Only	ND	Non - Mutable in CDS
PF3D7_1323600.1	conserved Plasmodium protein, unknown function	Unknown Function	Plasmodium and Other Apicomplexa	Essential	Non - Mutable in CDS
PF3D7_1367700.1	alanine--tRNA ligase	Known Pathway	Conserved Outside of Apicomplexa	Essential	Non - Mutable in CDS
PF3D7_0624400.1	conserved Plasmodium protein, unknown function	Unknown Function	Conserved Outside of Apicomplexa	Insufficient data	Non - Mutable in CDS
PF3D7_1437200.1	ribonucleoside-diphosphate reductase large subunit, putative	Known Pathway	Conserved Outside of Apicomplexa	Essential	Non - Mutable in CDS
PF3D7_0607900.1	conserved Plasmodium protein, unknown function	Unknown Function	Plasmodium Only	ND	Non - Mutable in CDS
PF3D7_0816600.1	chaperone protein ClpB1	Known Pathway	Conserved Outside of Apicomplexa	Essential	Non - Mutable in CDS
PF3D7_0918200.1	50S ribosomal protein L3, apicoplast, putative	Known Pathway	Conserved Outside of Apicomplexa	Essential	Non - Mutable in CDS
PF3D7_1440200.1	stromal-processing peptidase, putative	Known Pathway	Conserved Outside of Apicomplexa	Essential	Non - Mutable in CDS
PF3D7_0520800.1	conserved Plasmodium protein, unknown function	Unknown Function	Conserved Outside of Apicomplexa	Essential	Non - Mutable in CDS
PF3D7_0916200.1	conserved Plasmodium protein, unknown function	Unknown Function	Plasmodium Only	ND	Non - Mutable in CDS
PF3D7_1411400.1	plastid replication-repair enzyme	Known Pathway	Conserved Outside of Apicomplexa	Essential	Non - Mutable in CDS
PF3D7_0716600.1	cysteine desulfurase	Known Pathway	Conserved Outside of Apicomplexa	Slow	Non - Mutable in CDS
PF3D7_0729200.1	1-cys peroxiredoxin	Known Pathway	Conserved Outside of Apicomplexa	Dispensable	Mutable in CDS
PF3D7_1308800.1	tyrosine recombinase	Known Pathway	Conserved Outside of Apicomplexa	ND	Non - Mutable in CDS
PF3D7_1232100.1	60 kDa chaperonin	Known Pathway	Conserved Outside of Apicomplexa	Essential	Non - Mutable in CDS
PF3D7_1446200.1	M17 leucyl aminopeptidase	Known Pathway	Conserved Outside of Apicomplexa	Slow	Non - Mutable in CDS
PF3D7_1022800.1	4-hydroxy-3-methylbut-2-en-1-yl diphosphate synthase	Known Pathway	Conserved Outside of Apicomplexa	Essential	Non - Mutable in CDS
PF3D7_1228700.1	conserved Plasmodium protein, unknown function	Unknown Function	Plasmodium Only	Essential	Mutable in CDS
PF3D7_0820800.1	conserved Plasmodium protein, unknown function	Unknown Function	Plasmodium Only	ND	Non - Mutable in CDS
PF3D7_1333000.1	20 kDa chaperonin	Known Pathway	Conserved Outside of Apicomplexa	Essential	Non - Mutable in CDS
PF3D7_0112000.1	TatD-like deoxyribonuclease	Annotated Gene Product, Unknown Function	Conserved Outside of Apicomplexa	ND	Non - Mutable in CDS
PF3D7_1212100.1	peripheral plastid protein 1, putative	Annotated Gene Product, Unknown Function	Plasmodium and Other Apicomplexa	Essential	Non - Mutable in CDS
PF3D7_1420400.1	glycine--tRNA ligase	Known Pathway	Conserved Outside of Apicomplexa	Essential	Non - Mutable in CDS
PF3D7_0504400.1	ATP-dependent helicase, putative	Known Pathway	Conserved Outside of Apicomplexa	Essential	Non - Mutable in CDS
PF3D7_1443900.1	heat shock protein 90, putative	Known Pathway	Conserved Outside of Apicomplexa	Essential	Non - Mutable in CDS
PF3D7_1307600.1	DNA-directed RNA polymerase alpha chain, putative	Known Pathway	Conserved Outside of Apicomplexa	Essential	Non - Mutable in CDS
PF3D7_0106900.1	2-C-methyl-D-erythritol 4-phosphate cytidylyltransferase, putative	Known Pathway	Plasmodium Only	Essential	Non - Mutable in CDS
PF3D7_1419200.1	thioredoxin-like protein, putative	Known Pathway	Plasmodium and Other Apicomplexa	Essential	Mutable in CDS
PF3D7_1333200.1	ubiquitin-activating enzyme	Known Pathway	Conserved Outside of Apicomplexa	Essential	Non - Mutable in CDS
PF3D7_1117500.1	tyrosine--tRNA ligase	Known Pathway	Conserved Outside of Apicomplexa	ND	Non - Mutable in CDS
PF3D7_0913700.1	conserved Plasmodium protein, unknown function	Unknown Function	Plasmodium and Other Apicomplexa	Essential	Non - Mutable in CDS
PF3D7_1205300.1	conserved Plasmodium protein, unknown function	Unknown Function	Plasmodium Only	ND	Non - Mutable in CDS
PF3D7_1037100.1	pyruvate kinase 2	Known Pathway	Conserved Outside of Apicomplexa	Essential	Non - Mutable in CDS
PF3D7_1363700.1	conserved Plasmodium protein, unknown function	Unknown Function	Conserved Outside of Apicomplexa	Essential	Non - Mutable in CDS
PF3D7_0316300.1	inorganic pyrophosphatase, putative	Annotated Gene Product, Unknown Function	Conserved Outside of Apicomplexa	ND	Mutable in CDS
PF3D7_1406600.1	ATP-dependent Clp protease regulatory subunit ClpC, putative	Known Pathway	Conserved Outside of Apicomplexa	Essential	Non - Mutable in CDS
PF3D7_1216000.1	serine--tRNA ligase, putative	Known Pathway	Conserved Outside of Apicomplexa	Essential	Non - Mutable in CDS
PF3D7_0104400.1	4-hydroxy-3-methylbut-2-enyl diphosphate reductase	Known Pathway	Conserved Outside of Apicomplexa	ND	Mutable in CDS
PF3D7_1126000.1	threonine--tRNA ligase	Known Pathway	Conserved Outside of Apicomplexa	Essential	Non - Mutable in CDS
PF3D7_0601900.1	conserved Plasmodium protein, unknown function	Unknown Function	Plasmodium Only	ND	Non - Mutable in CDS
PF3D7_0203900.1	5'-3' exonuclease, N-terminal resolvase-like domain, putative	Known Pathway	Conserved Outside of Apicomplexa	Slow	Non - Mutable in CDS
PF3D7_1251700.1	tryptophan--tRNA ligase	Known Pathway	Conserved Outside of Apicomplexa	ND	Non - Mutable in CDS
PF3D7_1103400.1	FeS cluster assembly protein SufD, putative	Known Pathway	Conserved Outside of Apicomplexa	Essential	Non - Mutable in CDS
PF3D7_1106200.1	conserved Plasmodium protein, unknown function	Unknown Function	Plasmodium and Other Apicomplexa	ND	Non - Mutable in CDS
PF3D7_1430700.1	NADP-specific glutamate dehydrogenase	Known Pathway	Conserved Outside of Apicomplexa	ND	Non - Mutable in CDS
PF3D7_0316400.1	conserved Plasmodium protein, unknown function	Unknown Function	Plasmodium Only	Essential	Non - Mutable in CDS
PF3D7_1306200.1	conserved Plasmodium protein, unknown function	Unknown Function	Plasmodium and Other Apicomplexa	Essential	Non - Mutable in CDS
PF3D7_1472700.1	DNA-directed RNA polymerase, alpha subunit, putative	Known Pathway	Plasmodium and Other Apicomplexa	ND	Non - Mutable in CDS
PF3D7_0721100.1	conserved Plasmodium protein, unknown function	Unknown Function	Plasmodium Only	Essential	Non - Mutable in CDS
PF3D7_1332600.1	apurinic/apyrimidinic endonuclease Apn1, putative	Known Pathway	Conserved Outside of Apicomplexa	ND	Mutable in CDS
PF3D7_0508300.1	triose phosphate transporter	Known Pathway	Conserved Outside of Apicomplexa	ND	Non - Mutable in CDS
PF3D7_1015200.1	cysteine--tRNA ligase	Known Pathway	Conserved Outside of Apicomplexa	ND	Non - Mutable in CDS
PF3D7_0403300.1	conserved Plasmodium protein, unknown function	Unknown Function	Plasmodium Only	ND	Non - Mutable in CDS
PF3D7_1460900.1	apicoplast ribosomal protein S10, putative	Known Pathway	Plasmodium and Other Apicomplexa	ND	Non - Mutable in CDS
PF3D7_1460900.2	apicoplast ribosomal protein S10, putative	Known Pathway	Plasmodium and Other Apicomplexa	ND	Non - Mutable in CDS
PF3D7_1106100.1	apicoplast ribosomal protein S15 precursor, putative	Known Pathway	Conserved Outside of Apicomplexa	Essential	Non - Mutable in CDS
PF3D7_1463600.1	conserved Plasmodium protein, unknown function	Unknown Function	Plasmodium Only	ND	Mutable in CDS
PF3D7_0517100.1	conserved Plasmodium protein, unknown function	Unknown Function	Plasmodium and Other Apicomplexa	Essential	Non - Mutable in CDS
PF3D7_0107700.1	conserved Plasmodium membrane protein, unknown function	Unknown Function	Plasmodium Only	ND	Mutable in CDS
PF3D7_0932600.1	apicoplast ribosomal protein S6, putative	Known Pathway	Conserved Outside of Apicomplexa	ND	Mutable in CDS
PF3D7_0919600.1	dolichyl-diphosphooligosaccharide--protein glycosyltransferase, putative	Annotated Gene Product, Unknown Function	Conserved Outside of Apicomplexa	ND	Non - Mutable in CDS
PF3D7_1003200.1	ribosome-binding factor A, putative	Known Pathway	Conserved Outside of Apicomplexa	Slow	Non - Mutable in CDS
PF3D7_0415700.1	conserved Plasmodium protein, unknown function	Unknown Function	Plasmodium Only	ND	Non - Mutable in CDS
PF3D7_1249900.1	apicoplast dimethyladenosine synthase, putative	Known Pathway	Conserved Outside of Apicomplexa	Essential	Non - Mutable in CDS
PF3D7_0409700.1	peptide chain release factor 2	Known Pathway	Conserved Outside of Apicomplexa	Dispensable	Non - Mutable in CDS
PF3D7_1208000.1	apicoplast ribosomal protein L29 precursor, putative	Known Pathway	Plasmodium Only	ND	Non - Mutable in CDS
PF3D7_1034200.1	apicoplast ribosomal protein L27 precursor, putative	Known Pathway	Conserved Outside of Apicomplexa	ND	Non - Mutable in CDS
PF3D7_0529100.1	thioredoxin-like protein, putative	Known Pathway	Conserved Outside of Apicomplexa	Essential	Non - Mutable in CDS
PF3D7_0504200.1	ATP-dependent RNA helicase DDX27, putative	Known Pathway	Conserved Outside of Apicomplexa	Essential	Non - Mutable in CDS
PF3D7_1330200.1	conserved Plasmodium protein, unknown function	Unknown Function	Plasmodium Only	ND	Non - Mutable in CDS
PF3D7_1338900.1	serine/threonine protein kinase, putative	Annotated Gene Product, Unknown Function	Conserved Outside of Apicomplexa	Dispensable	Non - Mutable in CDS
PF3D7_0313700.2	conserved Plasmodium protein, unknown function, unspecified product	Unknown Function	Plasmodium Only	ND	Non - Mutable in CDS
PF3D7_0218300.1	apicoplast RNA methyltransferase precursor, putative	Known Pathway	Conserved Outside of Apicomplexa	Dispensable	Mutable in CDS
PF3D7_0108700.1	secreted ookinete protein, putative	Annotated Gene Product, Unknown Function	Plasmodium Only	ND	Mutable in CDS
PF3D7_1226900.1	conserved Plasmodium protein, unknown function	Unknown Function	Plasmodium Only	Dispensable	Mutable in CDS
PF3D7_0219500.1	pseudouridine synthase, putative	Known Pathway	Conserved Outside of Apicomplexa	Dispensable	Mutable in CDS
PF3D7_0810100.1	apicoplast ribosomal protein L33 precursor, putative	Known Pathway	Conserved Outside of Apicomplexa	ND	Non - Mutable in CDS
PF3D7_1330100.1	conserved Plasmodium protein, unknown function	Unknown Function	Plasmodium Only	ND	Non - Mutable in CDS
PF3D7_1242200.1	queuine tRNA-ribosyltransferase, putative	Known Pathway	Conserved Outside of Apicomplexa	ND	Non - Mutable in CDS
PF3D7_0310000.1	50S ribosomal protein L9, apicoplast, putative	Known Pathway	Plasmodium Only	Essential	Non - Mutable in CDS
PF3D7_0913500.1	protease, putative	Annotated Gene Product, Unknown Function	Conserved Outside of Apicomplexa	ND	Non - Mutable in CDS
PF3D7_1248600.1	conserved Plasmodium protein, unknown function	Unknown Function	Conserved Outside of Apicomplexa	ND	Non - Mutable in CDS
PF3D7_1127400.1	conserved Plasmodium protein, unknown function	Unknown Function	Plasmodium Only	Essential	Non - Mutable in CDS
PF3D7_0409500.1	conserved Plasmodium protein, unknown function	Unknown Function	Conserved Outside of Apicomplexa	Dispensable	Non - Mutable in CDS
PF3D7_0715200.1	conserved Plasmodium protein, unknown function	Unknown Function	Plasmodium and Other Apicomplexa	ND	Mutable in CDS
PF3D7_0522500.1	50S ribosomal protein L17, apicoplast, putative	Known Pathway	Conserved Outside of Apicomplexa	Essential	Non - Mutable in CDS
PF3D7_0519900.1	conserved Plasmodium protein, unknown function	Unknown Function	Conserved Outside of Apicomplexa	ND	Non - Mutable in CDS
PF3D7_1371500.1	probable protein, unknown function	Unknown Function	Conserved Outside of Apicomplexa	ND	Mutable in CDS
PF3D7_0604400.1	conserved Plasmodium protein, unknown function	Unknown Function	Plasmodium Only	ND	Non - Mutable in CDS
PF3D7_0313300.1	apicoplast conserved ycf19 protein precursor, unknown function	Unknown Function	Conserved Outside of Apicomplexa	ND	Non - Mutable in CDS
PF3D7_0413800.1	50S ribosomal protein L10, putative	Known Pathway	Plasmodium and Other Apicomplexa	ND	Non - Mutable in CDS
PF3D7_0715400.1	secreted ookinete protein, putative	Annotated Gene Product, Unknown Function	Plasmodium and Other Apicomplexa	ND	Mutable in CDS
PF3D7_0817100.1	tRNA modification GTPase, putative	Known Pathway	Conserved Outside of Apicomplexa	ND	Non - Mutable in CDS
PF3D7_1024000.1	conserved Plasmodium protein, unknown function	Unknown Function	Plasmodium Only	ND	Non - Mutable in CDS
PF3D7_0619100.1	conserved Plasmodium protein, unknown function	Unknown Function	Plasmodium Only	ND	Non - Mutable in CDS
PF3D7_0933300.1	conserved Plasmodium protein, unknown function	Unknown Function	Plasmodium Only	Essential	Non - Mutable in CDS
PF3D7_0911600.1	conserved Plasmodium protein, unknown function	Unknown Function	Plasmodium Only	ND	Non - Mutable in CDS
PF3D7_0710500.1	conserved Plasmodium protein, unknown function	Unknown Function	Plasmodium and Other Apicomplexa	ND	Non - Mutable in CDS
PF3D7_1349900.1	conserved Plasmodium protein, unknown function	Unknown Function	Plasmodium Only	Essential	Non - Mutable in CDS
PF3D7_0908100.1	conserved Plasmodium membrane protein, unknown function	Unknown Function	Plasmodium Only	Dispensable	Mutable in CDS
PF3D7_1236700.1	S-adenosyl-methyltransferase, putative	Annotated Gene Product, Unknown Function	Conserved Outside of Apicomplexa	ND	Non - Mutable in CDS
PF3D7_0820100.1	conserved Plasmodium protein, unknown function	Unknown Function	Plasmodium Only	Essential	Non - Mutable in CDS
PF3D7_1436100.1	conserved Plasmodium membrane protein, unknown function	Unknown Function	Conserved Outside of Apicomplexa	Dispensable	Non - Mutable in CDS
PF3D7_0315400.1	conserved Plasmodium protein, unknown function	Unknown Function	Plasmodium Only	Slow	Non - Mutable in CDS
PF3D7_0910800.1	cytosolic Fe-S cluster assembly factor NBP35, putative	Known Pathway	Conserved Outside of Apicomplexa	Essential	Non - Mutable in CDS
PF3D7_1360300.1	conserved Plasmodium protein, unknown function	Unknown Function	Plasmodium Only	Essential	Non - Mutable in CDS
PF3D7_0102300.1	Plasmodium exported protein, unknown function	Unknown Function	Conserved Outside of Apicomplexa	ND	Mutable in CDS
PF3D7_1125000.1	conserved Plasmodium protein, unknown function	Unknown Function	Plasmodium and Other Apicomplexa	ND	Non - Mutable in CDS
PF3D7_0613200.1	conserved Plasmodium protein, unknown function	Unknown Function	Plasmodium Only	ND	Mutable in CDS
PF3D7_1143000.1	alpha/beta hydrolase, putative	Annotated Gene Product, Unknown Function	Conserved Outside of Apicomplexa	Dispensable	Non - Mutable in CDS
PF3D7_0622200.1	radical SAM protein, putative	Annotated Gene Product, Unknown Function	Conserved Outside of Apicomplexa	Dispensable	Mutable in CDS
PF3D7_1210000.1	50S ribosomal protein L1, apicoplast, putative	Known Pathway	Conserved Outside of Apicomplexa	Essential	Non - Mutable in CDS
PF3D7_1304300.1	conserved Plasmodium protein, unknown function	Unknown Function	Plasmodium Only	ND	Non - Mutable in CDS
PF3D7_1248300.1	conserved Plasmodium membrane protein, unknown function	Unknown Function	Plasmodium and Other Apicomplexa	ND	Mutable in CDS
PF3D7_1453300.1	Yos1-like protein, putative	Annotated Gene Product, Unknown Function	Plasmodium and Other Apicomplexa	ND	Non - Mutable in CDS
PF3D7_1410700.1	conserved Plasmodium protein, unknown function	Unknown Function	Plasmodium and Other Apicomplexa	ND	Mutable in CDS
PF3D7_0908300.2	conserved protein, unknown function	Unknown Function	Conserved Outside of Apicomplexa	ND	Mutable in CDS
PF3D7_0508200.1	longevity-assurance (LAG1) protein, putative	Annotated Gene Product, Unknown Function	Conserved Outside of Apicomplexa	Dispensable	Mutable in CDS
PF3D7_0908300.1	conserved protein, unknown function	Unknown Function	Conserved Outside of Apicomplexa	ND	Mutable in CDS
PF3D7_0306600.1	conserved Plasmodium protein, unknown function	Unknown Function	Plasmodium and Other Apicomplexa	Dispensable	Non - Mutable in CDS
PF3D7_0313200.1	conserved Plasmodium protein, unknown function	Unknown Function	Plasmodium and Other Apicomplexa	ND	Non - Mutable in CDS
PF3D7_0623500.1	superoxide dismutase [Fe]	Known Pathway	Plasmodium and Other Apicomplexa	Dispensable	Non - Mutable in CDS
PF3D7_0907800.1	apicoplast ribosomal protein L35 precursor, putative	Known Pathway	Conserved Outside of Apicomplexa	Essential	Non - Mutable in CDS
PF3D7_0710300.1	conserved Plasmodium membrane protein, unknown function	Unknown Function	Plasmodium and Other Apicomplexa	Dispensable	Non - Mutable in CDS
PF3D7_0422100.1	transmembrane emp24 domain-containing protein, putative	Annotated Gene Product, Unknown Function	Conserved Outside of Apicomplexa	ND	Non - Mutable in CDS
PF3D7_0210800.1	conserved Plasmodium protein, unknown function	Unknown Function	Plasmodium Only	Slow	Non - Mutable in CDS
PF3D7_1135000.2	PQ-loop repeat-containing protein, unspecified product	Annotated Gene Product, Unknown Function	Conserved Outside of Apicomplexa	ND	Mutable in CDS
PF3D7_1135000.3	PQ-loop repeat-containing protein, unspecified product	Annotated Gene Product, Unknown Function	Conserved Outside of Apicomplexa	ND	Mutable in CDS
PF3D7_0912400.1	alkaline phosphatase, putative	Annotated Gene Product, Unknown Function	Conserved Outside of Apicomplexa	ND	Mutable in CDS
PF3D7_1121500.1	conserved Plasmodium protein, unknown function	Unknown Function	Conserved Outside of Apicomplexa	ND	Non - Mutable in CDS
PF3D7_0820600.1	conserved Plasmodium membrane protein, unknown function	Unknown Function	Conserved Outside of Apicomplexa	Dispensable	Mutable in CDS
PF3D7_0311600.1	dolichyl-diphosphooligosaccharide--protein glycosyltransferase subunit 1, putative	Annotated Gene Product, Unknown Function	Conserved Outside of Apicomplexa	Essential	Non - Mutable in CDS
PF3D7_0918800.1	dihydrouridine synthase, putative	Known Pathway	Conserved Outside of Apicomplexa	Slow	Mutable in CDS
PF3D7_1353300.1	conserved Plasmodium protein, unknown function	Unknown Function	Conserved Outside of Apicomplexa	ND	Mutable in CDS
PF3D7_1009600.1	protein phosphatase, putative	Annotated Gene Product, Unknown Function	Conserved Outside of Apicomplexa	ND	Non - Mutable in CDS
PF3D7_0819700.1	conserved Plasmodium protein, unknown function	Unknown Function	Plasmodium Only	ND	Non - Mutable in CDS
PF3D7_0505700.1	conserved Plasmodium membrane protein, unknown function	Unknown Function	Conserved Outside of Apicomplexa	ND	Mutable in CDS
PF3D7_1429600.1	conserved Plasmodium protein, unknown function	Unknown Function	Plasmodium and Other Apicomplexa	ND	Mutable in CDS
PF3D7_1443700.1	dephospho-CoA kinase, putative	Known Pathway	Conserved Outside of Apicomplexa	Essential	Non - Mutable in CDS
PF3D7_1455900.1	polyprenol reductase, putative	Annotated Gene Product, Unknown Function	Conserved Outside of Apicomplexa	Essential	Non - Mutable in CDS
PF3D7_0613400.1	apicoplast ribosomal protein L18 precursor, putative	Known Pathway	Conserved Outside of Apicomplexa	ND	Non - Mutable in CDS
PF3D7_1458100.1	protein PET117, putative	Annotated Gene Product, Unknown Function	Plasmodium and Other Apicomplexa	ND	Non - Mutable in CDS
PF3D7_1207500.1	RNA-binding protein, putative	Annotated Gene Product, Unknown Function	Plasmodium and Other Apicomplexa	Essential	Non - Mutable in CDS
PF3D7_0109850.1	phosphatidate cytidylyltransferase, putative	Annotated Gene Product, Unknown Function	Plasmodium and Other Apicomplexa	ND	ND
PF3D7_1119000.1	acyl-CoA-binding protein, putative	Annotated Gene Product, Unknown Function	Conserved Outside of Apicomplexa	Slow	Mutable in CDS
PF3D7_0514200.1	conserved Plasmodium protein, unknown function	Unknown Function	Plasmodium Only	Essential	Mutable in CDS
PF3D7_0407200.1	peptidyl-tRNA hydrolase 2, putative	Known Pathway	Conserved Outside of Apicomplexa	Essential	Non - Mutable in CDS
PF3D7_1467400.1	50S ribosomal protein L22, apicoplast, putative	Known Pathway	Plasmodium and Other Apicomplexa	ND	Non - Mutable in CDS
PF3D7_1137500.1	apicoplast ribosomal protein S14p/S29e precursor, putative	Known Pathway	Conserved Outside of Apicomplexa	Essential	Non - Mutable in CDS
PF3D7_0525700.1	conserved Plasmodium protein, unknown function	Unknown Function	Plasmodium and Other Apicomplexa	ND	Non - Mutable in CDS
PF3D7_1340200.1	conserved Plasmodium protein, unknown function	Unknown Function	Plasmodium Only	ND	Non - Mutable in CDS
PF3D7_0914000.1	pseudouridylate synthase, putative	Known Pathway	Conserved Outside of Apicomplexa	ND	Mutable in CDS
PF3D7_1340800.1	mitochondrial pyruvate carrier protein 1, putative	Known Pathway	Conserved Outside of Apicomplexa	ND	Non - Mutable in CDS
PF3D7_1242000.1	conserved Plasmodium protein, unknown function	Unknown Function	Plasmodium Only	Dispensable	Non - Mutable in CDS
PF3D7_0507200.1	subtilisin-like protease 3	Annotated Gene Product, Unknown Function	Conserved Outside of Apicomplexa	ND	Mutable in CDS
PF3D7_0731600.1	acyl-CoA synthetase	Known Pathway	Conserved Outside of Apicomplexa	ND	Mutable in CDS
PF3D7_1133800.1	RNA (uracil-5-)methyltransferase, putative	Known Pathway	Conserved Outside of Apicomplexa	Essential	Non - Mutable in CDS
PF3D7_1351200.1	conserved Plasmodium protein, unknown function	Unknown Function	Plasmodium Only	ND	Non - Mutable in CDS
PF3D7_0313900.1	conserved Plasmodium protein, unknown function	Unknown Function	Plasmodium Only	Dispensable	Mutable in CDS
PF3D7_0604900.1	conserved Plasmodium protein, unknown function	Unknown Function	Plasmodium Only	ND	Non - Mutable in CDS
PF3D7_0926400.1	monocarboxylate transporter, putative	Annotated Gene Product, Unknown Function	Conserved Outside of Apicomplexa	ND	Mutable in CDS
PF3D7_0726700.1	conserved Plasmodium protein, unknown function	Unknown Function	Plasmodium Only	ND	Non - Mutable in CDS
PF3D7_0918400.1	conserved Plasmodium protein, unknown function	Unknown Function	Plasmodium Only	Dispensable	Mutable in CDS
PF3D7_0529000.1	conserved Plasmodium protein, unknown function	Unknown Function	Conserved Outside of Apicomplexa	Essential	Non - Mutable in CDS
PF3D7_1123500.1	conserved Plasmodium protein, unknown function	Unknown Function	Conserved Outside of Apicomplexa	ND	Mutable in CDS
PF3D7_1372400.1	acyl-CoA synthetase	Known Pathway	Conserved Outside of Apicomplexa	ND	Mutable in CDS
PF3D7_1023300.1	conserved Plasmodium protein, unknown function	Unknown Function	Plasmodium and Other Apicomplexa	ND	Non - Mutable in CDS
PF3D7_0206100.1	cysteine desulfuration protein SufE	Known Pathway	Conserved Outside of Apicomplexa	Essential	Non - Mutable in CDS
PF3D7_0307400.1	ATP-dependent Clp protease proteolytic subunit	Known Pathway	Conserved Outside of Apicomplexa	ND	Non - Mutable in CDS
PF3D7_1436800.1	ATP-dependent Clp protease proteolytic subunit	Known Pathway	Conserved Outside of Apicomplexa	ND	Non - Mutable in CDS
PF3D7_1357200.1	glutamate--tRNA ligase	Known Pathway	Conserved Outside of Apicomplexa	ND	Non - Mutable in CDS
PF3D7_1469000.1	translation initiation factor IF-1	Known Pathway	Conserved Outside of Apicomplexa	Essential	Non - Mutable in CDS
PF3D7_1034600.1	translation initiation factor IF-3, putative	Known Pathway	Plasmodium and Other Apicomplexa	ND	Non - Mutable in CDS
PF3D7_0408900.2	tRNA N6-adenosine threonylcarbamoyltransferase	Known Pathway	Plasmodium Only	ND	Non - Mutable in CDS
PF3D7_0409400.1	chaperone protein DnaJ	Known Pathway	Conserved Outside of Apicomplexa	Essential	Mutable in CDS
PF3D7_0529300.1	apicoplast TIC22 protein	Known Pathway	Conserved Outside of Apicomplexa	Dispensable	Non - Mutable in CDS
PF3D7_1452300.1	DER1-like protein	Known Pathway	Conserved Outside of Apicomplexa	Slow	Mutable in CDS
PF3D7_0314300.1	DER1-like protein	Known Pathway	Conserved Outside of Apicomplexa	ND	Non - Mutable in CDS
PF3D7_0711000.1	AAA family ATPase, CDC48 subfamily	Known Pathway	Conserved Outside of Apicomplexa	Essential	Non - Mutable in CDS
PF3D7_1124500.1	pyruvate dehydrogenase E1 component subunit alpha	Known Pathway	Conserved Outside of Apicomplexa	Essential	Non - Mutable in CDS
PF3D7_0815900.1	dihydrolipoyl dehydrogenase, apicoplast	Known Pathway	Conserved Outside of Apicomplexa	Dispensable	Mutable in CDS
PF3D7_1440300.1	porphobilinogen synthase	Known Pathway	Conserved Outside of Apicomplexa	Essential	Non - Mutable in CDS
PF3D7_1209600.1	porphobilinogen deaminase	Known Pathway	Conserved Outside of Apicomplexa	Dispensable	Non - Mutable in CDS
PF3D7_0615100.1	enoyl-acyl carrier reductase	Known Pathway	Conserved Outside of Apicomplexa	ND	Non - Mutable in CDS
PF3D7_1360800.1	falcilysin	Known Pathway	Conserved Outside of Apicomplexa	Essential	Non - Mutable in CDS
PF3D7_1469600.1	biotin carboxylase subunit of acetyl CoA carboxylase, putative	Known Pathway	Conserved Outside of Apicomplexa	Essential	Mutable in CDS
PF3D7_1345500.1	ubiquitin-conjugating enzyme E2	Known Pathway	Conserved Outside of Apicomplexa	Essential	Non - Mutable in CDS
PF3D7_0316900.1	E3 ubiquitin-protein ligase, putative	Known Pathway	Plasmodium and Other Apicomplexa	Essential	Mutable in CDS
PF3D7_0312100.1	E3 ubiquitin-protein ligase, putative	Known Pathway	Conserved Outside of Apicomplexa	Dispensable	Non - Mutable in CDS
PF3D7_0607300.1	uroporphyrinogen III decarboxylase	Known Pathway	Conserved Outside of Apicomplexa	Dispensable	Mutable in CDS
PF3D7_0921400.1	NifU-like scaffold protein, putative	Known Pathway	Conserved Outside of Apicomplexa	Dispensable	Mutable in CDS
PF3D7_0211400.1	beta-ketoacyl-ACP synthase III	Known Pathway	Conserved Outside of Apicomplexa	Slow	Mutable in CDS
PF3D7_1318100.1	ferredoxin, putative	Known Pathway	Conserved Outside of Apicomplexa	Essential	Non - Mutable in CDS
PF3D7_0604700.1	glyoxalase I	Known Pathway	Plasmodium Only	ND	Non - Mutable in CDS
PF3D7_1205700.1	targeted glyoxalase II	Known Pathway	Plasmodium Only	Dispensable	Mutable in CDS
PF3D7_1212000.1	glutathione peroxidase-like thioredoxin peroxidase	Known Pathway	Conserved Outside of Apicomplexa	ND	Non - Mutable in CDS
PF3D7_1419800.2	glutathione reductase	Known Pathway	Conserved Outside of Apicomplexa	ND	Non - Mutable in CDS
PF3D7_1344600.1	lipoyl synthase	Known Pathway	Conserved Outside of Apicomplexa	Dispensable	Non - Mutable in CDS
PF3D7_0923600.1	lipoate-protein ligase 2	Known Pathway	Conserved Outside of Apicomplexa	Slow	Non - Mutable in CDS
PF3D7_1446400.1	pyruvate dehydrogenase E1 component subunit beta	Known Pathway	Conserved Outside of Apicomplexa	ND	Mutable in CDS
PF3D7_1312000.1	malonyl CoA-acyl carrier protein transacylase	Known Pathway	Conserved Outside of Apicomplexa	Dispensable	Non - Mutable in CDS
PF3D7_0626300.1	3-oxoacyl-acyl-carrier protein synthase I/II	Known Pathway	Conserved Outside of Apicomplexa	Dispensable	Mutable in CDS
PF3D7_0922900.1	3-oxoacyl-[acyl-carrier-protein] reductase	Known Pathway	Conserved Outside of Apicomplexa	Dispensable	Mutable in CDS
PF3D7_1323000.1	beta-hydroxyacyl-ACP dehydratase	Known Pathway	Conserved Outside of Apicomplexa	Dispensable	Non - Mutable in CDS
PF3D7_0823600.1	lipoate-protein ligase B	Known Pathway	Conserved Outside of Apicomplexa	Dispensable	Mutable in CDS
PF3D7_1114800.1	glycerol-3-phosphate dehydrogenase, putative	Known Pathway	Conserved Outside of Apicomplexa	Dispensable	Non - Mutable in CDS
PF3D7_1318200.1	glycerol-3-phosphate 1-O-acyltransferase	Known Pathway	Conserved Outside of Apicomplexa	ND	Mutable in CDS
PF3D7_1320100.1	ATP-dependent Clp protease adapter protein ClpS	Known Pathway	Conserved Outside of Apicomplexa	Essential	Non - Mutable in CDS
PF3D7_1337200.1	1-deoxy-D-xylulose 5-phosphate synthase	Known Pathway	Conserved Outside of Apicomplexa	ND	Non - Mutable in CDS
PF3D7_1467300.1	1-deoxy-D-xylulose 5-phosphate reductoisomerase	Known Pathway	Conserved Outside of Apicomplexa	Essential	Non - Mutable in CDS
PF3D7_1144700.1	apicoplast import protein Tic20, putative	Known Pathway	Plasmodium and Other Apicomplexa	Slow	Non - Mutable in CDS
PF3D7_0623200.1	ferredoxin--NADP reductase	Known Pathway	Conserved Outside of Apicomplexa	Essential	Non - Mutable in CDS
PF3D7_1234600.1	protein TOC75, putative	Known Pathway	Conserved Outside of Apicomplexa	ND	Non - Mutable in CDS
PF3D7_0916500.1	ubiquitin fusion degradation protein 1	Known Pathway	Conserved Outside of Apicomplexa	ND	Non - Mutable in CDS
PF3D7_1329700.1	apicoplast calcium binding protein 1	Annotated Gene Product, Unknown Function	Plasmodium Only	ND	Mutable in CDS
