# Supplementary material for: Integrative proteomics and bioinformatic prediction enable a high-confidence apicoplast proteome in malaria parasites
Source: PLoS Biol. 2018 Sep 13;16(9):e2005895. doi: 10.1371/journal.pbio.2005895 (PMC6155542; doi:10.1371/journal.pbio.2005895)
Supplement: S10 Table — (XLSX) [file pbio.2005895.s018.xlsx]

## Sheet: Sheet1
Name	Sequence	Description
MB015	TATACAATATACCTAGGATGAAGATCTTATTACTTTG	Amplification of ACP leader sequence for pRL2-ACPL-GFP plasmid
MB016	CTCCTTTACTCGTACGTGGGTTTTTATTTTTTATC	Amplification of ACP leader sequence for pRL2-ACPL-GFP plasmid
MB087	TAAAAACCCACGTACGAGTAAAGG	Amplification of GFP for pRL2-ACPL-GFP-BirA* plasmid
MB088	TCCTTGTCTTTGTATAGTTCATCCATGCC	Amplification of GFP for pRL2-ACPL-GFP-BirA* plasmid
MB089	ATACAAAGACAAGGACAACACCGTGCC	Amplification of BirA* for pRL2-ACPL-GFP-BirA* plasmid
MB090	ATAACTCGACCTTAAGTTACTTCTCTGCGCTTCTCAGGG	Amplification of BirA* for pRL2-ACPL-GFP-BirA* plasmid
MB093	TATACAATATACCTAGGATGAAGATCTTATTACTTTGTATAATTTTTCTATATTATGTTAACGCTTTTAAAAATACACGTACGAGTAAAGGAGAAGAACTTTTC	Amplification of SP-GFP-BirA*-SDEL for pRL2-SP-GFP-BirA*-SDEL plasmid
MB094	ATAACTCGACCTTAAGTTATAATTCGTCACTCTTCTCTGCGCTTCTCAGGG	Amplification of SP-GFP-BirA*-SDEL for pRL2-SP-GFP-BirA*-SDEL plasmid
MB126	ATACAATATACCTAGGATGTTAAGGCTCATCAAAGTACTATTTC	Amplification of PF3D7_0521400 for pRL2-0521400-GFP plasmid
MB127	CTCCTTTACTCGTACGTAAACCTTTTAATTTAAGCTTTAGGTCATC	Amplification of PF3D7_0521400 for pRL2-0521400-GFP plasmid
MB130	ATACAATATACCTAGGATGAATATTATAGTTAATTTTATATATATATATAT	Amplification of ROM7 (PF3D7_1358300) for pRL2-ROM7-GFP plasmid
MB131	CTCCTTTACTCGTACGGTTTTTCTCAAAGGCGATAATAAGG	Amplification of ROM7 (PF3D7_1358300) for pRL2-ROM7-GFP plasmid
MB132	ATACAATATACCTAGGATGTCACACATATTAAGAGGAATAATATATATCC	Amplification of PF3D7_1472800 for pRL2-1472800-GFP plasmid
MB133	CTCCTTTACTCGTACGTGTTTCTTTTCCGTCTTGTAAAAG	Amplification of PF3D7_1472800 for pRL2-1472800-GFP plasmid
MB150	ATACAATATACCTAGGATGTCGAGACTTTTCTCTTTCTTG	Amplification of PF3D7_0721100 for pRL2-0721100-GFP plasmid
MB151	CTCCTTTACTCGTACGTTCAGTCACATAACATACTGGATGG	Amplification of PF3D7_0721100 for pRL2-0721100-GFP plasmid
MB255	GCGTAATCAGGTACATCATAAGG	ABCB7/ABCF1 left homology region integration check
MB256	CATTGACTGTGCCGGCCGGCCCGTACGCCATTGGAGATATTCAAAAATG	Amplification of ABCB7 (PF3D7_1209900) left homology region for pSN054-ABCB7-TetR-DOZI plasmid
MB257	AACACCAACATTCATGTTGTC	Amplification of ABCB7 (PF3D7_1209900) left homology region for pSN054-ABCB7-TetR-DOZI plasmid
MB258	ACCCTGTTATCCCTAAAATAAAAGGATTGTATTCATTTATTCTATATATTGC	Amplification of ABCB7 (PF3D7_1209900) right homology region for pSN054-ABCB7-TetR-DOZI plasmid
MB259	GTATTAGACCTAGGGATAACAGGGTAATTTATCTTATATTTATCTTCTCTTTCTAATAAGGGC	Amplification of ABCB7 (PF3D7_1209900) right homology region for pSN054-ABCB7-TetR-DOZI plasmid
MB260	CATTGACTGTGCCGGCCGGCCCGTACGGATGATATGATATCCAATGAAAATTTTTG	Amplification of ABCF1 (PF3D7_0813700) left homology region for pSN054-ABCF1-TetR-DOZI plasmid
MB261	TTGAAAAATTTCTTCTTGTATATTTATTTGTTC	Amplification of ABCF1 (PF3D7_0813700) left homology region for pSN054-ABCF1-TetR-DOZI plasmid
MB262	ACCCTGTTATCCCTAAAACAATGAAGCAATTAAATAAAAACAAATATTTA	Amplification of ABCF1 (PF3D7_0813700) right homology region for pSN054-ABCF1-TetR-DOZI plasmid
MB263	GTATTAGACCTAGGGATAACAGGGTAATTTATTCATTTATTTGTTTATATTTTTCCCATAGG	Amplification of ABCF1 (PF3D7_0813700) right homology region for pSN054-ABCF1-TetR-DOZI plasmid
MB269	AAAAACATTCATTAGTAAAATCAGGG	ABCB7 left homology region integration check
MB270	TGCAATATATAGAATAAATGAATACAATCC	ABCB7 left homology region integration check
MB271	ACAAAATATGATAAAAAAATTAAATGCTG	ABCF1 left homology region integration check
MB272	AAAATAAAATAAAATAAAAATAAGGAATGTTAAC	ABCF1 left homology region integration check
MB276	GTCTTGAGGGGTTTTTTGC	ABCB7/ABCF1 right homology region integration check
MB278	GATATAACATATTTATTATCTTTATATTTTTCTTTCC	ABCB7 right homology region integration check
MB281	GATTATATAGGAGTAATAGAAGAGGGC	ABCB7 right homology region integration check
MB282	AAAAAATTATGAACAAATAAATATACAAGAAG	ABCF1 right homology region integration check
MB283	CAAAGAAGCCGACTAAAAATG	ABCF1 right homology region integration check
MB332	ATACAATATACCTAGGATGAAATTTATATTTTTATATTTACTTATTTTATACAAA	Amplification of PF3D7_1349900 for pRL2-1349900-GFP plasmid
MB333	CTCCTTTACTCGTACGCATTTCGTTGCCCCGTAT	Amplification of PF3D7_1349900 for pRL2-1349900-GFP plasmid
MB334	ATACAATATACCTAGGATGCCAAGTACACAAATTTTC	Amplification of PF3D7_1330100 for pRL2-1349900-GFP plasmid
MB335	CTCCTTTACTCGTACGTATATTATCTATGTCAGTTTCTGTTTCTAC	Amplification of PF3D7_1330100 for pRL2-1349900-GFP plasmid
p1	GAAAATATTATTACAAAGGGTGAGG	attL integration check; from Adjallay et al. Methods Mol Biol 2010
p2	TTAGCTAATTCGCTTGTAAG	attL integration check; from Adjallay et al. Methods Mol Biol 2010
MW001	GACGTCTAAGAAACCATTATTATCATGACATTAACC	attR integration check
MW003	GCCAAGCGCGCAATTAACCCTC	attR integration and attB unintegrated check
MW004	AAATATTATTACAAAGGGTGAGGAGGAAGAGG	attB unintegrated check
TufA F	GATATTGATTCAGCTCCAGAAGAAA	Apicoplast genome qPCR; from Yeh and DeRisi PLOS Biol 2011
TufA R	ATATCCATTTGTGTGGCTCCTATAA	Apicoplast genome qPCR; from Yeh and DeRisi PLOS Biol 2011
CHT1 F	TGTTTCCTTCAACCCCTTTT	Nuclear genome qPCR; from Yeh and DeRisi PLOS Biol 2011
CHT1 R	TAATCCAAACCCGTCTGCTC	Nuclear genome qPCR; from Yeh and DeRisi PLOS Biol 2011
ABCB7 recoded C-terminus-3xHA gBlock	GACAACATGAATGTTGGTGTTAACGGAACGAGTCTGAGCGGGGGACAAAAACAGCGCATTTACCTTGCTCAAAATCTTATTAAGAACAACAAAATTTTGATCCTTGATGAACCAACATCATCCCTGGACAAGTTGTCCGAAAACATCATTAATAAAGCGTTGATCAAATACATGAAGGATAAGACAACGATTATTTTTACTCATCGTTTAGACTTGTTGAATTATGTAGATTACATTGGAGTAATTGAGGAAGGACAAATTATCCAGTTCGACAAACGTCAGTCCGTGCTTCAGAAGCCGTGCCCGATTTTGAAAAAGATCTTAACGCAAGGCGTCTCCGAACGTACGTATCCATATGATGTTCCTGACTATGCAAATGGTTACCCATATGACGTACCA…	ABCB7 recoding and HA tag for pSN054-ABCB7-TetR-DOZI plasmid
ABCB7 sgRNA cassette gBlock	AATGGCCCCTTTCCGGGCGCGCCCGTAACTATAACGGTCCTAAGGTAGCGAATAATACGACTCACTATAGGAATGGTACATCCTTATCAGGGTTTTAGAGCTAGAAATAGCAAGTTAAAATAAGGCTAGTCCGTTATCAACTTGAAAAAGTGGCACCGAGTCGGTGCTAGCATAACCCCTTGGGGCCTCTAAACGGGTCTTGAGGGGTTTTTTGCGGTCTCAGTGGTGTACGGTACAAACCCGGAATTCGAGCTCGGGGCGCGCCATTACCCTGTTATCCCTAAAAT	ABCB7 sgRNA for pSN054-ABCB7-TetR-DOZI plasmid
ABCF1 recoded C-terminus-3xHA gBlock	GAACAAATAAATATACAAGAAGAAATTTTTCAAAAAAAGAAAATCAACAAAAAGAATTTCGGGGGAAAGGGCACTAGCGGTAAGATTAAGATTAAGAACTGGAAACGCTGGAAAAAACGTACGTATCCATATGATGTTCCTGACTATGCAAATGGTTACCCATATGACGTACCAGACTATGCTAATGGATATCCTTATGATGTACCTGATTACGCTTAAGGGCCCCTAGAAATTATCTA	ABCF1 recoding and HA tag for pSN054-ABCF1-TetR-DOZI plasmid
ABCF1 sgRNA cassette gBlock	AATGGCCCCTTTCCGGGCGCGCCCGTAACTATAACGGTCCTAAGGTAGCGAATAATACGACTCACTATAGGTTTGGAGGCAAAGGAACCTCGTTTTAGAGCTAGAAATAGCAAGTTAAAATAAGGCTAGTCCGTTATCAACTTGAAAAAGTGGCACCGAGTCGGTGCTAGCATAACCCCTTGGGGCCTCTAAACGGGTCTTGAGGGGTTTTTTGCGGTCTCAGTGGTGTACGGTACAAACCCGGAATTCGAGCTCGGGGCGCGCCATTACCCTGTTATCCCTAAAAC	ABCF1 sgRNA for pSN054-ABCB7-TetR-DOZI plasmid
